## **The organization of leukotriene biosynthesis on the nuclear envelope revealed by single molecule localization microscopy and computational analyses**

Angela B. Schmider<sup>1¶</sup>, Melissa Vaught<sup>1¶</sup>, Nicholas C. Bauer<sup>1</sup>, Hunter L. Elliott<sup>2</sup>, Matthew D. Godin<sup>1</sup>, Giorgianna E. Ellis<sup>1</sup>, Peter Nigrovic<sup>3</sup>, Roy J. Soberman<sup>1\*</sup>

<sup>1</sup> Nephrology Division, Department of Medicine, Massachusetts General Hospital and Harvard Medical School, Boston, MA

<sup>2</sup> Image and Data Analysis Core, Department of Cell Biology, Harvard Medical School, Boston, MA

<sup>3</sup> Division of Rheumatology, Immunology and Allergy, Department of Medicine, Brigham and Women's Hospital and Harvard Medical School, Boston, MA

\* Corresponding author

E-mail: [rsoberman@mgh.harvard.edu](mailto:rsoberman@mgh.harvard.edu) (RJS)

¶ These authors contributed equally to this work.

## 1 **Abstract**

2           The initial steps in the synthesis of leukotrienes are the translocation of 5-lipoxygenase  
3 (5-LO) to the nuclear envelope and its subsequent association with its scaffold protein 5-  
4 lipoxygenase-activating protein (FLAP). A major gap in our understanding of this process is the  
5 knowledge of how the organization of 5-LO and FLAP on the nuclear envelope regulates  
6 leukotriene synthesis. We combined single molecule localization microscopy with Clus-DoC  
7 cluster analysis, and also a novel unbiased cluster analysis to analyze changes in the  
8 relationships between 5-LO and FLAP in response to activation of RBL-2H3 cells to generate  
9 leukotriene C<sub>4</sub>. We identified the time-dependent reorganization of both 5-LO and FLAP into  
10 higher-order assemblies or clusters in response to cell activation via the IgE receptor. Clus-DoC  
11 analysis identified a subset of these clusters with a high degree of interaction between 5-LO and  
12 FLAP that specifically correlates with the time course of LTC<sub>4</sub> synthesis, strongly suggesting  
13 their role in the initiation of leukotriene biosynthesis.

## 14 **Introduction**

15           All cells must integrate and transduce multiple extracellular signals to achieve an  
16 appropriate functional response. In mast cells, the classic pathway of cell activation in response  
17 to an allergen is initiated by antigen binding to allergen-specific IgE antibodies coating mast  
18 cells via the IgE receptor (FcεR1; FcERI; UniProtKB: P12319) [1-3]. Antigen binding triggers the  
19 aggregation of FcεR1 receptors, activating their downstream pathways by recruiting a series of  
20 kinases to the cytoplasmic tail, and prolongs its presence on the plasma membrane [2, 4-7]. The  
21 kinase cascade sets in motion multiple processes including degranulation and the synthesis of  
22 leukotriene B<sub>4</sub> (LTB<sub>4</sub>) [8, 9] and LTC<sub>4</sub> [10, 11]. Activated mast cells predominantly make LTC<sub>4</sub>  
23 [10, 11] and to a lesser extent LTB<sub>4</sub> [9, 12]. In all cases, cells must generate a balanced  
24 response of lipid mediators and gene expression that is proportional to the strength, duration,  
25 and composition of the stimuli.

26 One way cells integrate signals is by the organization and disassembly of higher order  
27 multiprotein assemblies; especially those regulated by transient weak interactions [13, 14].  
28 These structures must be assembled at the right time with the correct spatial localization.  
29 Modulating their composition and organization by orchestrating changes in the relationships  
30 between member proteins, such as by post-translational modification, can determine cellular  
31 responses to stimuli [13-15].

32 Leukotrienes (LTs), arachidonate 5-lipoxygenase (5-LO; UniProtKB: P09917) products  
33 of arachidonic acid (AA) metabolism, play a major role in initiating and amplifying inflammatory  
34 diseases, ranging from asthma to cardiovascular disease. Because of the dire consequences of  
35 the unregulated activation of this pathway, cells have evolved a series of complex control  
36 mechanisms to prevent the inadvertent initiation of LT synthesis. One strategy is based on the  
37 spatial segregation of the biosynthetic enzymes in different cellular compartments. In resting  
38 cells, 5-LO is localized in the nucleus and cytosol, and cytosolic phospholipase A<sub>2</sub> (cPLA<sub>2</sub>;  
39 UniProtKB: P47712) is in the cytosol [16-21]. In activated mast cells, calcium influx triggers  
40 translocation of cPLA<sub>2</sub> to the Golgi and ER membranes [16, 17], and of 5-LO to the nuclear  
41 envelope [19, 21], a main site LT synthesis. cPLA<sub>2</sub> releases AA from the membrane  
42 phospholipids. To form the core of the LT synthetic complex on the nuclear envelope, [22, 23],  
43 AA associates with the homotrimeric integral membrane scaffold protein, arachidonate 5-  
44 lipoxygenase-activating protein (FLAP; UniProtKB: P20292). This event alters the relationship  
45 between the N- and C-terminal domains of FLAP [23] leading to recruitment of membrane-  
46 associated 5-LO [22, 23]. Though this is a transient, weak interaction requiring chemical  
47 crosslinking to identify biochemically [24], the 5-LO–FLAP complex functions to efficiently  
48 present AA to 5-LO and initiate synthesis of the parent LT, LTA<sub>4</sub>. In the presence of LTC<sub>4</sub>  
49 synthase LTA<sub>4</sub> is converted to LTC<sub>4</sub>, the first of the cysteinyl LTs[25] and is carried out of the  
50 cell by multidrug resistance-associated protein 4 (ABCC4; MRP4; UniProtKB: O15439) [26].

51 The formation and organization of higher order assemblies of receptors and enzymes is

52 now considered an important regulatory process in signaling [27, 28]. This principle has been  
53 established for inflammasomes and signalosomes [29, 30]. In the context of the 5-LO pathway,  
54 the organization of the core LT synthetic complex into higher order assemblies could have  
55 several potential benefits. First, it could buffer the system from an “all or nothing” response to  
56 individual/random signals. Second, since AA diffuses through membranes and is rapidly re-  
57 esterified (28), it would provide a mechanism to increase the local concentration of the  
58 substrate and facilitate its availability to FLAP. Finally, it would provide a platform to integrate  
59 multiple signals.

60 We combined two-color direct stochastic optical reconstruction microscopy (dSTORM)  
61 single molecule localization microscopy (SMLM) with Clus-DoC analysis [31], and also linked  
62 single-color (conventional) STORM with a second unbiased clustering algorithm to define the  
63 time-dependent assembly and disassembly of higher order organizations of 5-LO and FLAP on  
64 the nuclear envelope. We identified a subset of clusters that contained a high degree of  
65 interaction between 5-LO and FLAP. Their assembly and disassembly was directly correlated  
66 with the synthesis of LTC<sub>4</sub>.

## 67 **Results**

### 68 **Analysis workflow for developing a model of 5-LO and FLAP** 69 **on the nuclear envelope**

70 Analysis of the structure and characteristics of higher order assemblies has been  
71 facilitated by recent SMLM superresolution techniques combined with computational  
72 approaches. To determine 5-LO and FLAP organization on the nuclear envelope, two different  
73 computational analyses were applied following image acquisition (Fig 1). Tab-delimited text files  
74 (.txt) containing the localization list from each image set were output for each approach. We  
75 employed a clustering and colocalization algorithm, Clus-DoC [31] to two-color dSTORM data  
76 (purple). Clus-DoC assigns a degree of colocalization (DoC) score to each localization and

77 determines percent colocalization, as well as cluster properties including the number of clusters  
78 in a region of interest (ROI), cluster area, and density. We also calculated other parameters  
79 such as the percent of interacting localizations inside clusters. In a second, supportive  
80 approach, we developed a novel unbiased clustering analysis based on a variable bandwidth  
81 mean-shift algorithm for conventional STORM data (orange). This analysis makes no  
82 assumptions about cluster size and is especially valuable for clusters curved around a  
83 membrane (S1 Fig).

84

85 **Fig 1. Analysis workflow for measuring the properties of 5-LO and FLAP and their**  
86 **relationship on the nuclear envelope.** Initially, a .txt file with tab-delimited x/y coordinates of  
87 all localizations from both channels was generated. To analyze two-color dSTORM (purple),  
88 FLAP localizations were used to define a region of interest (ROI) around the nuclear envelope,  
89 which was also applied to 5-LO within the Clus-DoC user interface. Degree of colocalization  
90 (DoC) scores were calculated for each localization. DBSCAN detected clusters and defines  
91 cluster contours, yielding cluster maps and cluster properties. For conventional STORM  
92 (orange), FLAP localizations were used to define an ROI around the nuclear envelope, or in the  
93 perinuclear region and nucleus for 5-LO. Within unbiased cluster analysis, cluster maps with  
94 cluster properties are determined. Data from both methods were combined to produce a model  
95 of membrane reorganization of 5-LO and FLAP.

96

## 97 **Relationship of 5-LO and FLAP on the nuclear envelope**

98 RBL-2H3 cells were primed with anti-TNP IgE and then stimulated with TNP-BSA for 2,  
99 5, 7, and 10 min. Total media concentrations of LTC<sub>4</sub> at each time point were measured, with  
100 significant LTC<sub>4</sub> accumulating by 5 min and reaching peak levels by 7 min (Fig 2A). Cells were  
101 washed, fixed, and co-stained for 5-LO (ATTO 488; left/green) and FLAP (Alexa Fluor 647;

102 middle/red), then imaged by dSTORM (Fig 2B). 5-LO is present at the nuclear membrane at 5  
103 and 7 min (Fig 2B), whereas FLAP is present on the nuclear membrane at all time points (Fig  
104 2B).

105  
106 **Fig 2. 5-LO and FLAP localization on the nuclear envelope on mast cell activation by two-**  
107 **color dSTORM.** RBL-2H3 cells (100,000 per well) were primed with anti-TNP IgE then activated  
108 with TNP-BSA for 0, 2, 5, 7, and 10 min, or left not treated (NT). Localization data was collected  
109 by two-color dSTORM. (A) Total media concentration of LTC<sub>4</sub> (pg/mL) was measured by  
110 enzyme immunoassay. Mean ± SEM. Time points significantly different from 0 min (1-way  
111 ANOVA with Bonferroni post-hoc test) indicated by \*p < 0.05, \*\*\*\*p < 0.0005. (B) Representative  
112 two-color STORM images of 5-LO (left panel, green) and FLAP (middle panel, red) following  
113 activation over time. Scale bar = 5 μm.

114  
115 **5-LO and FLAP colocalize on the nuclear envelope**

116 Colocalization of 5-LO and FLAP in dSTORM images of activated mast cells at NT, and  
117 2, 5, 7, and 10 min post-activation was determined using Clus-DoC [31]. Analysis was restricted  
118 to the nuclear envelope by manually drawn regions of interest (ROIs) based on FLAP  
119 localization. Fig 3A shows both the localization maps (left panels) and colocalization maps  
120 colored by DoC score, -1 (anticorrelated) to 1 (correlated) (right panels). The representative  
121 cells shown are identical to those shown in Fig 2B. The increase in orange and red localizations  
122 at 5 and 7 min represent increased colocalization between 5-LO and FLAP (Fig 3A, right  
123 panels). Fig 3B shows histograms of DoC scores in both directions (left: 5-LO to FLAP; right:  
124 FLAP to 5-LO) from the ROIs at NT (top) and 7 min (bottom). The frequency distributions for the  
125 ROIs selected at 2, 5 and 10 min are shown in S2 Fig. The percent of colocalized localizations,  
126 defined as the fraction of localizations with a DoC score ≥ 0.4, was determined for each ROI. At

127 5 and 7 min a two-fold increase in the percent of 5-LO molecules that were colocalized with  
128 FLAP was detected compared with NT (Fig 3D, left). No such difference was detected  
129 comparing FLAP to 5-LO due to high levels of FLAP compared with 5-LO (Fig 3D, right). These  
130 times correspond with maximal observed LTC<sub>4</sub> synthesis (Fig 2A).

131  
132 **Fig 3. 5-LO and FLAP colocalize on the nuclear envelope by two-color dSTORM.** RBL-  
133 2H3 cells were primed with anti-TNP IgE then activated with TNP-BSA for 2, 5, 7 and 10 min, or  
134 left not treated (NT). Localization data was collected by two-color dSTORM and analyzed with  
135 ClusDoC. Data shown is from the representative cells shown in Fig 2. (A) Localization maps for  
136 5-LO (green) and FLAP (red) (left panels) and colocalization maps for 5-LO relative to FLAP. 5-  
137 LO molecules are color-coded according to their degree of colocalization (DoC) scores (right  
138 panels, score bar at the bottom). (B,C) Histograms of DoC scores of all molecules for 5-LO  
139 (green) and FLAP (red) from representative cells at (B) 0 and (C) 7 min. (D) Percent  
140 colocalization of 5-LO molecules with FLAP from all ROIs (left panel; green) and percent  
141 colocalization of FLAP molecules with 5-LO from all ROIs (right panel; red). Statistical  
142 significance was assessed by Kolmogorov-Smirnov test, with significance indicated by \* $p <$   
143 0.05. Bars show mean  $\pm$  SEM from 4 to 21 cells over 3 separate experiments.

## 144 145 **The formation of higher order assemblies of 5LO and FLAP**

146 If higher order assemblies of 5-LO and FLAP play a regulatory role in LT synthesis, their  
147 formation and disassembly on the nuclear envelope should be correlated with LTC<sub>4</sub> production.  
148 We employed the Clus-DoC algorithm to test this hypothesis. The algorithm measured the  
149 colocalization of the localizations and then sorted them into clusters or excluded them as  
150 outliers. The algorithm then calculated the characteristics of the identified clusters, allowing  
151 changes in molecular organization to be detected. Cluster maps of 5-LO and FLAP for the cells

152 analyzed in Figs 2-3 are shown in S3 Fig; cluster contours are indicated by the black outline and  
153 points outside of clusters are shown in gray. Two levels of cluster limits were applied as  
154 modifications of Clus-DoC. First, a threshold of >5 localizations for 5-LO or >10 localizations for  
155 FLAP were used to define a true cluster. A higher threshold was chosen for FLAP because it  
156 functions as a homotrimer [24], increasing the chance that identified clusters contain at least 3  
157 functional FLAP molecules. A second level was used to distinguish clusters with no  
158 colocalization (no interaction clusters (NIC); white bars), a high degree of colocalization (high  
159 interaction clusters (HIC); black bars) denoting at least 5 localizations with a DoC score of  $\geq 0.4$ ,  
160 and all other clusters (low interaction clusters (LIC); gray bars). The properties of clusters were  
161 compared between HIC, LIC, and NIC at different time points (Fig 4). The number of HIC per  
162 ROI increased from 0.3 at NT and 2.3 at 2 min to 6.4 and 7.8 at 5 and 7 min, respectively, and  
163 returned to 0.6 at 10 min (Fig 4A). Because there were <3 ROIs containing HIC at NT, 2 and 10  
164 min, we excluded them from further analysis. The appearance and disappearance of HIC  
165 correlates with peak LTC<sub>4</sub> synthesis, suggesting that the formation of HIC is required for LTA<sub>4</sub>  
166 synthesis and that disassembly of these clusters is a critical step in the termination of synthesis.

167  
168 **Fig 4. Activation changes 5-LO and FLAP cluster properties by two-color dSTORM.** RBL-  
169 2H3 cells were primed with anti-TNP IgE then activated with TNP-BSA for 2, 5, 7, and 10 min,  
170 or left not treated (NT). Localization data was collected by two-color dSTORM and analyzed  
171 with Clus-DoC. Clusters were defined as having either  $\geq 5$  5-LO localizations or 10 FLAP  
172 localizations, and were split into 3 categories based on the number of founding localizations with  
173 a degree of colocalization (DoC) score  $\geq 0.4$  indicating interaction: no interaction clusters (NIC;  
174 white bars) with 0 interacting localizations; low interaction clusters (LIC; gray bars) with between  
175 1 and 4 interacting localizations; and high interaction clusters (HIC; black bars) with 5 or more  
176 interacting localizations. (A) Average number of clusters per ROI. (B) Average cluster area.  
177 (C,D) Average number of 5-LO and FLAP localizations per cluster, respectively. (E,F) Relative



178 density of 5-LO and FLAP in clusters, respectively. Relative density of clusters was calculated  
179 by dividing the local density within 20 nm of each localization by the average density of the  
180 cluster, a measure of the local concentration maxima within the cluster. (G,H) Percent of  
181 interacting 5-LO and FLAP localizations located in clusters, respectively. Time points for a  
182 cluster type with fewer than 3 values for that cluster type were excluded. One-way ANOVA with  
183 Tukey's post-hoc multiple comparisons test was performed to determine significance among  
184 interaction groups where \* $p < 0.05$ , \*\* $p < 0.005$  and \*\*\*\* $p < 0.0001$ ; within timepoint, HIC–NIC or  
185 HIC–LIC indicated by black brackets, LIC–NIC by orange line; between timepoints by blue line.  
186 Bars show mean  $\pm$  SEM of clusters within 4 to 21 cells over 3 independent experiments.

187

## 188 **Properties of HIC link them to LT synthesis**

189 Changes in six separate properties of HIC are temporally correlated with LTC<sub>4</sub> synthesis.  
190 First, their area is approximately 2-fold larger than LIC and NIC at 5 and 10 min after activation,  
191 respectively (Fig 4B). Similarly, the average number of 5-LO localizations in HIC are 10-20 fold  
192 higher than those in NIC and LIC (Fig 4B). In contrast, number of 5-LO localizations in NIC and  
193 LIC remained unchanged over time (Fig 4C). The number of FLAP molecules in HIC was  
194 approximately 3-fold higher (5 min) and 2-fold higher (7 min) than in LIC and NIC, which did not  
195 change over the time course of the experiment (Fig 4D).

196 The relative density of 5-LO in clusters remained unchanged within NIC and LIC over  
197 time. Relative density is calculated as the average of local density within 20 nm of each  
198 localization in the cluster, divided by the average cluster density, providing a measure of the  
199 distribution of localizations within a cluster. However, the relative density of 5-LO in HIC was  
200 elevated 2-fold at 5 min and 15-fold greater than that of NIC and LIC at 7 min (Fig 4E).  
201 Interestingly, FLAP relative densities for NIC were 2-fold lower at 5 and 7 min than in LIC or HIC  
202 (Fig 4F).

203           We next calculated the percent of all 5-LO and FLAP interacting localizations that are in  
204 clusters. At 2, 5 and 7 min after activation, the vast majority of 5-LO molecules were found in  
205 either LIC or HIC (Fig 4F). This was true for FLAP at all time points (Fig 4G). Taken together,  
206 these data link the formation and disassembly of HIC to LTC<sub>4</sub> formation.

## 207 **The dynamic organization of 5-LO analyzed by conventional** 208 **STORM**

209           Conventional STORM experiments in combination with unbiased cluster analysis  
210 revealed similar cluster properties to those revealed using Clus-DoC. The cells were prepared  
211 identically but stained only for 5-LO and imaged by STORM. Because conventional STORM  
212 was used in these experiments, FLAP localizations were not available to define the nucleus in  
213 the same cell. Therefore, the whole nucleus and perinuclear area was included in the ROI. RBL-  
214 2H3 cells were analyzed at 0, 2, 5, and 10 min after cell priming and activation. 5-LO  
215 localizations in representative cells acquired by STORM are shown in Fig 5A (top panels).  
216 Unbiased cluster analysis grouped localizations into clusters of >3 localizations. The  
217 organization of 5-LO was not uniform across the nucleus and the region that included the  
218 nuclear envelope, both in size and shape (Fig 5A, middle panels) and number of localizations  
219 per cluster (Fig 5A, lower panels, pseudocolor legend below). Convex hulls represent cluster  
220 contour (Fig 5A, middle panels). An outline derived from immunofluorescence illustrates where  
221 the nuclear envelope lies. Unbiased cluster analysis showed that both the number of 5-LO  
222 clusters per cell and the number of localizations per cluster increased at 2 and 5 min post-  
223 activation compared to control and decreased to baseline at 10 min post-activation (Fig 5A,  
224 lower panels).

225           Using 95% confidence intervals (CI), the mean number of localizations associated with  
226 clusters (pooled across all cells of a condition and time point) of 5-LO increased from 32 to 38, 2  
227 min after the addition of antigen and peaked at 5 min, having 45 localizations per cluster (a 25%

228 increase). After 10 min, the mean number of localizations dwindled to 22, which is lower than  
229 unstimulated conditions (0 min), suggesting complex disassembly (Fig 5B). The mean size of 5-  
230 LO cluster areas was also analyzed using 95% CIs. In non-activated cells, there were small  
231 numbers of 5-LO associated with the nuclear envelope and a correspondingly low number of  
232 localizations per cluster were detected in unstimulated conditions. The mean area of 5-LO  
233 clusters identified on the nuclear envelope was  $\sim 2.1 \times 10^4 \text{ nm}^2$  (Fig 5C). At 2 min following cell  
234 activation, the mean cluster area climbed to  $3.4 \times 10^4 \text{ nm}^2$  and then to  $4 \times 10^4 \text{ nm}^2$  at 5 min and 10  
235 min (Fig 5C). The mean cluster density declined over time, decreasing by 50% at 5 min and  
236 returning to control levels at 10 min post-activation (Fig 5D).

237  
238 **Fig 5. Activation organizes 5-LO into clusters by conventional STORM.** RBL-2H3 cells  
239 were primed with anti-TNP IgE then activated with TNP-BSA for 0, 2, 5, and 10 min and  
240 analyzed as shown S1 Fig. Cells were imaged with conventional STORM and cluster properties  
241 were analyzed with unbiased cluster analysis. (A) Detailed STORM analysis of 5-LO following  
242 priming and activation over time. Grayscale STORM images show localizations (upper panels),  
243 clusters are shown as convex hulls (middle panels, arbitrary colors) and 5-LO clusters are  
244 shown as points colored by number of localizations in the cluster (lower panels, legend bar  
245 below). (B) The average number of localizations per cluster over time. (C) The average area of  
246 5-LO clusters over time. (D) The average density of 5-LO clusters over time. Plots show mean  $\pm$   
247 95% confidence intervals of all pooled clusters identified in cells for that time point. At least 3  
248 separate experiments collected between 10 and 30 cells. Scale bar = 5  $\mu\text{m}$ .

249  
250 To determine whether 5-LO clusters of a specific size, area, or density are assembled  
251 after cell activation, we employed weight-normalized histograms of the ROIs in Fig 5. There was  
252 a progressive increase in the frequency of the clusters containing the highest numbers of  
253 localizations (greater than 250 localizations or more) at 2 and 5 min stimulation, then decreasing

254 at 10 min (S4 Fig). The organizational shift from a high frequency of clusters in control cells  
255 containing few localizations per cluster (less than 100) to significantly more localizations per  
256 cluster (greater than 250) occurred at 2 and 5 min after cell activation, concurrent with LT  
257 production (Fig 2A). Stimulating cells for 10 min resulted in the same pattern of localization  
258 frequency as control. The mean number of 5-LO localizations per cluster was discernably higher  
259 following cell activation at 2 and 5 min compared to control (S4 Fig, inset). Following stimulation,  
260 the frequency of clusters with larger areas increased over time (S4 Fig, inset), while the  
261 densities of clusters remained constant (S4 Fig, inset).

262 The formation of higher order FLAP assemblies was detected using conventional  
263 STORM in combination with unbiased cluster analysis. FLAP is primarily localized to the nuclear  
264 envelope and to a lesser extent on the ER membrane. Because we were interested in analyzing  
265 FLAP distribution in its primary localization, we used FLAP localizations to define the nuclear  
266 envelope for unbiased cluster analysis. We first probed whether FLAP would reorganize within  
267 the nuclear envelope following IgE priming and antigen activation. RBL-2H3 cells were primed  
268 and activated for 0 or 7 min. Fig 6A shows the STORM and cluster analyses images with  
269 convex hulls (middle panels) and numbers per cluster (lower panels, pseudocolor legend  
270 below). Weight-normalized histograms show that distribution of clusters shifts to the left after  
271 addition of antigen, whereas cells only primed with IgE contain a higher frequency of clusters  
272 with more localizations (Fig 6B). There was an increase in clusters containing between 250 and  
273 450 localizations corresponding to ~83-150 trimers when cells were primed and activated (Fig  
274 6B). A similar pattern was observed for cluster areas. Cells that were only primed with IgE  
275 contained a greater number of clusters with larger cluster areas compared to cells that were  
276 primed and activated with antigen (Fig 6C). The frequency profile for cluster density was  
277 marginally different between IgE-primed and IgE-antigen activated cells (Fig 6D). The mean  
278 number of localizations per cluster decreased approximately 25% following addition of antigen  
279 (Fig 6B, inset) and the mean cluster area decreased from  $1.4 \times 10^5 \text{ nm}^2$  to  $0.8 \times 10^5 \text{ nm}^2$  following

280 antigen stimulation (Fig 6C, inset). In parallel, the mean density of clusters increased ~25%  
281 from  $1.7 \times 10^{-3}$  localizations/nm<sup>2</sup> to  $\sim 2.4 \times 10^{-3}$  localizations/nm<sup>2</sup> after antigen stimulation,  
282 suggesting that following antigen, FLAP clusters become more compact.

283

284 **Fig 6. FLAP re-organization on the nuclear envelope.** RBL-2H3 cells were primed with anti-  
285 TNP IgE then activated with TNP-BSA for 0 and 7 min then analyzed as shown Fig 1. Cells  
286 were imaged with conventional STORM and cluster properties were analyzed with unbiased  
287 cluster analysis. (A) Detailed STORM analysis of FLAP following priming and activation over  
288 time. Grayscale images show localizations (upper panels), cluster areas are shown as convex  
289 hulls (middle panels, arbitrary colors) and FLAP clusters are shown as points colored by number  
290 of localizations in the cluster (lower panels, legend bar below). Scale bar = 5  $\mu$ m. (B-D)  
291 Normalized point-weighted histograms with inset bars showing mean  $\pm$  SEM for (B) number of  
292 localizations, (C) cluster areas and (D) cluster densities. Student's t-test was used to determine  
293 significance indicated by \* $p < 0.05$  and \*\*\*\* $p < 0.0005$ . At least 3 separate experiments collected  
294 between 10 and 30 cells.

295

296 Since the interaction of 5-LO with FLAP is dependent on the association of AA with  
297 FLAP [24], we tested whether the organization of 5-LO into higher order assemblies was also  
298 dependent on AA (S5 Fig). Cells were primed with IgE and then stimulated by the addition of  
299 antigen for 7 min in the presence or absence of the cPLA<sub>2</sub> inhibitor (Inh), or the presence or  
300 absence of the FLAP inhibitor MK886. When the release of AA was blocked (S5 Fig A-C,  
301 insets), there was no change in distributions for the number, area or density cluster properties of  
302 5-LO localizations (S5 Fig, A-C, insets). As shown in weight-normalized histograms, the  
303 frequency of these clusters was unchanged (S5 Fig, A-C). When MK886 was added the  
304 properties of clusters changed. The mean number of localizations per cluster and cluster area  
305 both increased (S5 Fig, A, B insets), while the cluster density decreased (S5 Fig, inset). There

306 was a higher frequency of clusters containing 100 or more localizations per cluster in cells pre-  
307 treated with MK886 compared to primed and activated cells without inhibitor (S5 Fig). A similar  
308 pattern was seen in cluster area where the frequency of clusters with larger areas was higher in  
309 cells pre-treated with MK886 (S5 Fig). Though the mean density per cluster decreased, the  
310 distribution was similar to that with cells treated with IgE and antigen alone and cells pre-treated  
311 with MK886 (S5 Fig).

312 In the presence of the cPLA<sub>2</sub> Inh or the FLAP Inh following priming with IgE and antigen,  
313 the number of FLAP localizations per cluster decreased (Figures S5, inset). The shifts in the  
314 frequency distribution of clusters for each inhibitor were similar, with fewer localizations in each  
315 cluster compared to cells only primed and activated (S5 Fig). The mean cluster area slightly  
316 decreased when cells were exposed to the cPLA<sub>2</sub> inhibitor during priming and antigen activation  
317 (S5 Fig, inset). MK886 had no effect on FLAP cluster area following cell priming and antigen  
318 activation (S5 Fig). Localization frequencies were left shifted when cells were exposed to either  
319 cPLA<sub>2</sub> inhibitor or FLAP inhibitor. This was a slight, but notable decrease in the frequency of  
320 clusters containing 300 localizations or more (Fig 4D). Cluster density was unchanged in the  
321 presence of cPLA<sub>2</sub> or FLAP inhibitors (S5 Fig).

## 322 Discussion

323 Analysis of two color dSTORM data using the Clus-DoC algorithm allowed us to define  
324 three classes of clusters: NIC, LIC, and HIC, and provided strong evidence linking HIC to the  
325 synthesis of LTs (Figs 1-4). The peak changes in the number of HIC and their properties  
326 occurred at 5 and 7 minutes, times of maximal LTC<sub>4</sub> generation. These changes include  
327 increases in area, the average number of 5-LO and FLAP localizations per cluster, and the  
328 percent of 5-LO and FLAP in HIC interacting with each other (Fig 4). As with 5-LO, the number  
329 of FLAP localizations in HIC increased at 5 and 7 min. Furthermore, almost all FLAP molecules  
330 that interact are in LIC or HIC. Interestingly, compared to LIC, the relative density of FLAP in

331 HIC is lower. Using conventional STORM, the same trends were observed for the area and  
332 number of 5-LO localizations, whereas there was a modest decrease in average density  
333 (localizations per unit area) at 2 and 5 min post-activation, which may be attributed to the use of  
334 the whole nucleus as an ROI. The FLAP localization data obtained with conventional STORM  
335 identifies global changes in properties of clusters, but highlights the benefits of two-color  
336 dSTORM paired with clustering algorithms that consider both molecules of interest in  
337 characterizing higher order assemblies. Despite the limitations of conventional STORM, a role  
338 of FLAP in regulating higher order assemblies of 5-LO is supported by experiments with MK886,  
339 which occupies the extended AA binding site, in which the number of 5-LO molecules and area  
340 of 5-LO in clusters is increased. In contrast, cPLA<sub>2</sub> Inh had no effect on organization, suggesting  
341 that overall re-organization of 5-LO or FLAP is independent of AA.

342         The number of localizations can be considered an estimate of the number of molecules  
343 in a cluster. Determining the absolute number of molecules from STORM data is difficult due to  
344 the stochastic blinking behavior of the fluorophores [32], but relative assessments should be  
345 less affected. In two-color dSTORM experiments the number of localizations per HIC was 20-30  
346 for 5-LO and 40-60 for FLAP at 5 and 7 min. Because FLAP functions as a trimer [24], this data  
347 provides a rough estimate of a near-stoichiometric 5-LO:FLAP ratio of 1:1 to 2:1 in HIC. At 5  
348 and 7 min post-activation, the peak of LT synthesis, a significant fraction of interacting  
349 localizations for both 5-LO and FLAP are localized in HIC. Together, these data strongly  
350 indicate a role for clustering in mediating LT synthesis.

351         The critical regulatory role for higher order assemblies, typified by signalosomes, is the  
352 new paradigm which must be considered when evaluating all membrane signaling processes  
353 [26-30]. These studies were based upon data obtained with crystallography and electron  
354 microscopy (EM) [21]. When combined with algorithms such as Clus-DoC, two-color dSTORM  
355 is a nanoscale SMLM approach that provides the ability to test for higher order organization  
356 while maintaining cellular organization. SMLM combined with cluster analysis has allowed the

357 identification of the segregation of clusters of active and inactive integrin molecules on  
358 membranes [33]. iPALM has successfully elucidated the role of integrin configuration during  
359 adhesion [34]. Previous work by our laboratory using fluorescence lifetime imaging microscopy  
360 and biochemical crosslinking identified the interaction of 5-LO and FLAP [22, 23, 35]. This work  
361 was supported by subsequent studies, including those using overexpression approaches and/or  
362 non-physiological stimuli to probe the relationship between the two molecules [36-38]. None of  
363 these earlier approaches have addressed the critical concept of membrane organization at  
364 nanoscale and were limited by the technologies employed.

365 Overall, our work links higher order assemblies of 5-LO and FLAP to the initiation of LT  
366 synthesis on the nuclear envelope. Fig 7 shows our proposed model: At steady state (NT), small  
367 numbers of clusters (NIC; light gray outline) of 5-LO (green) or FLAP (red) exist on the nuclear  
368 membrane, few with 5-LO associated with FLAP (LIC; dark gray outline). By 2 min after  
369 activation, there is an increase in both total number of 5-LO and FLAP in NIC and LIC. Between  
370 5 and 7 min post-activation, clusters with extensive interaction between 5-LO and FLAP (HIC;  
371 black outline) have formed. By 10 min, no HIC remain. Our work illustrates the power of using  
372 two-color dSTORM combined with algorithms such as Clus-DoC to analyze data, allowing us to  
373 unveil relationships not obtainable by conventional STORM and cluster analysis. Characterizing  
374 the mechanisms of higher order assembly and disassembly of biosynthetic complexes is  
375 ultimately essential to understanding the initiation of LT synthesis and the generation of other  
376 eicosanoids and products of eicosapentaenoic acid and docosahexanoic acid.

377  
378 **Fig 7. Proposed model linking HIC to LTC<sub>4</sub> synthesis.** At steady state (NT), small clusters  
379 (NIC, light gray outline) of 5-LO (green) or FLAP (red) exist on the nuclear membrane, few with  
380 5-LO associated with FLAP (LIC, dark gray outline). By 2 min after activation, 5-LO and FLAP  
381 increasingly interact and more LIC are observed. Between 5 and 7 min after activation, large  
382 clusters with extensive interaction between 5-LO and FLAP have formed (HIC, black outline)



383 and produce  $LTA_4$ , which is converted to  $LTC_4$  then released from the cell. HIC are no longer  
384 observed at 10 min.

385

## 386 **Materials and methods**

### 387 **Cell culture, activation, fixation, staining**

388 RBL-2H3 cells (ATCC, CRL-2256) were maintained in Dulbecco's modified Eagle's  
389 medium (DMEM) supplemented with 10% heat-inactivated FCS, 2 mM glutamine, penicillin (100  
390 units/mL), and streptomycin (0.1 mg/mL). The cells were primed with trinitrophenol (TNP)-  
391 specific IgE (0.1  $\mu$ g/mL IgE-3 clone, BD Biosciences) at 37 °C for 45 min in Dulbecco's  
392 phosphate buffered saline (DPBS) containing glucose,  $Ca^{2+}$ ,  $Mg^{2+}$  (Cellgro), and 0.1% BSA  
393 (DPBS/BSA) to load IgE onto  $Fc\epsilon RI$  without LT synthesis. Following incubation with IgE, cells  
394 were washed with DPBS to remove unbound IgE.  $LTC_4$  synthesis was initiated by addition of  
395 TNP-conjugated BSA (TNP-BSA, 25 ng/mL in DPBS/BSA, Santa Cruz Biotechnology). (N-  
396  $\{(2S,4R)-4-(Biphenyl-2-ylmethyl-isobutyl-amino)-1-[2-(2,4-difluorobenzoyl)-benzoyl]-pyrrolidin-2-$   
397  $ylmethyl\}8-3-(4-(2,4-dioxothiazolidin-5-ylidenemethyl)-phenyl)acrylamide$  (cPLA<sub>2</sub> inhibitor, cPLA<sub>2</sub>  
398 Inh, Calbiochem, EMD Biosciences), was used concomitantly with priming at 5  $\mu$ M and MK-886  
399 (FLAP Inh, Cayman Chemical) was also used concomitantly at 5 nM.

### 400 **$LTC_4$ synthesis assay**

401 To analyze  $LTC_4$  generation, an enzyme immunoassay kit for  $LTC_4$  (Cayman Chemical)  
402 was used per manufacturer's instructions. Culture media was removed at desired times and  
403 stored at -80 °C until use.

## 404 **Stochastic optical reconstruction microscopy**

### 405 **Preparation of secondary antibodies**

406 To produce activator-reporter tandem dye pair antibodies for conventional STORM,  
407 Donkey anti-rabbit and donkey anti-goat affinity purified secondary antibodies (H+L chains)  
408 (Jackson Laboratory) were conjugated to Cy3 (Jackson ImmunoResearch) (activator) and Alexa  
409 Fluor 647 (AF647, Life Technologies) (reporter). For the conjugation reactions, 65 µg of the  
410 secondary antibody was reacted with 3 µg of the activator dye (Cy3) and 1.5 µg of the reporter  
411 dye (AF647) in 103 mM carbonic buffer for 2 hours at room temperature in the dark.

412 To produce reporter antibodies for direct STORM, donkey anti-goat and donkey anti-  
413 mouse affinity purified secondary antibodies (H+L chains) (Jackson Laboratory) were  
414 conjugated to ATTO 488 (Millapore Sigma) or AF647 dyes, both with carboxylic acid  
415 succinimidyl ester moieties. For the conjugation reactions, 240 µg of the secondary antibody  
416 was reacted with 6 µg of dye in 56 mM carbonic buffer for 2 hours at room temperature.

417 After the reactions, the antibodies were separated from unconjugated dye by gravity  
418 filtration through Sephadex G-25 DNA grade size exclusion columns (GE Healthcare) by visual  
419 detection. Antibody and dye concentrations were determined using a NanoDrop spectrometer  
420 (Thermo Fisher) to record absorbance at 280 nm and at the dye absorbance peak. Antibody  
421 concentration was calculated by subtracting the contribution of each dye to absorbance at 280  
422 nm using correction factors provided by the dye manufacturers (ATTO488: 0.1, Cy3B: 0.09,  
423 AF647: 0.03) and the molar extinction coefficient of the antibody (210,000).

424 The activator dye:antibody:reporter dye ratio for Cy3:donkey-anti-rabbit:AF647 was  
425 0.8:1:2.1 with antibody concentration of 145 µg/µL. The ratio for conjugated Cy3:donkey-anti-  
426 goat:AF647 was 1.1:1:3.2 with antibody concentration of 140 µg/µL. The antibody:dye ratio for  
427 donkey-anti-mouse:ATTO488 was 1:2.7 with antibody concentration of 280 µg/µL. The ratio for  
428 donkey-anti-goat:AF647 was 1:1.7 with antibody concentration of 200 µg/µL.

## 429 **Conventional STORM**

430 After activation, cells were fixed and prepared for STORM as previously described [39].  
431 The following day they were stained with antibodies to FLAP (Novus IMG 3160, 1:100) or to 5-  
432 LO (Santa Cruz H-120, sc-20785, RRID: AB\_2226938, 1:20). Activator-reporter antibody was  
433 applied at 3  $\mu\text{g}/\text{mL}$  for 1 h. Imaging buffer containing 147 mM  $\beta\text{ME}$  and 1% (v/v) glucose  
434 oxidase with catalase (GLOX) was used to promote photoswitching and reduce photobleaching  
435 [39]. Cells were imaged in continuous mode on an inverted Nikon Ti-Eclipse STORM 3.0 system  
436 equipped with 100X/1.4 NA objective lens, iXon X3 EM CCD camera (Andor), and 647 nm (300  
437 mW), 561 nm (150 mW) and 405 nm lasers (100 mW). 9,000 frames for each dye were  
438 collected at 30 ms exposure time. Localizations were identified with NIS Elements 3.0 (Nikon  
439 Instruments) and exported as tab-delimited text files.

## 440 **Two-color dSTORM**

441 After activation, cells were fixed and prepared for superresolution microscopy [39]. The  
442 following day they were probed with antibodies to FLAP (Novus, IMG 3160, 1:100) and to 5-LO  
443 (BD Biosciences, 610695, RRID: AB\_398018). Secondary antibodies were applied at 3  $\mu\text{g}/\text{mL}$   
444 for 1 h. The imaging buffer containing 100 mM 2-mercaptoethanolamine (MEA) and 1% (v/v)  
445 GLOX was used to promote photoswitching and reduce photobleaching [39]. An inverted Nikon  
446 Ti2 Eclipse STORM 5.0 system with Perfect Focus focal plane lock was used for image  
447 acquisition. This system contains a NSTORM quadband filter, and 405, 488, 561, and 647 nm  
448 lasers and was equipped with an HP APO TIRF AC 100x/1.49 NA oil objective and ORCA-  
449 Flash4.0 SCI CMOS PLUS camera (Hamamatsu Photonics). 15,000 frames for each dye were  
450 collected at 30 ms exposure time. Localizations were identified with NIS Elements 5.0 (Nikon  
451 Instruments) and exported as tab-delimited text files.

## 452 **Clus-DoC analysis of single molecule localizations**

453 To avoid prejudicial selection of membrane regions for analysis, we used localization  
454 data prior to cluster analysis to specify ROIs; thereby restricting our analysis to localizations that  
455 represent molecules on the nuclear envelope. EM studies demonstrated the localization of 5-LO  
456 and FLAP in the nuclear envelope after cell activation [21]. We employed Clus-DoC [31], which  
457 quantifies colocalization of individual proteins and molecules (localizations) and cluster  
458 properties. Clus-DoC allows for the user to define the number and DoC threshold.

## 459 **Unbiased cluster analysis**

460 We implemented a modified form of the variable bandwidth mean shift (VBMS) algorithm  
461 with automatic bandwidth selection previously described [40], using the diagonal bandwidth  
462 matrix estimation method. The final bandwidth used (250 nM) was then selected from these  
463 estimates automatically, and is allowed to vary from point to point, thereby adapting to variations  
464 in scale and structure between and within datasets.

465 Our modifications were primarily designed to improve analysis time. Running all test  
466 bandwidths in parallel rather than in serial decreased execution time over 10-fold. Storing the  
467 STORM data in kd-trees and calculating kernel updates using points within only 4x the  
468 bandwidth of the current mean provided faster mean shift direction estimates without sacrificing  
469 accuracy. The data was preprocessed with the DBSCAN algorithm [41], with the distance cutoff  
470 set based on the 99.9<sup>th</sup> percentile of nearest-neighbor distances within the dataset. Regions  
471 which were determined to be independent during this conservative DBSCAN pre-clustering  
472 stage were processed independently in parallel. Because the VBMS algorithm scales  
473 nonlinearly with the number of points, this optimization further increased processing efficiency  
474 beyond that provided by parallelization. Single isolated points were also removed at this stage,  
475 providing another ~10x increase in processing speed.

## 476 **Statistics**

477 EIA was analyzed using one-way ANOVA followed by Bonferroni multiple comparison  
478 post-test where  $p < 0.05$  was considered significant. Unbiased cluster property histograms were  
479 first tested for normality using Kolmogorov-Smirnov and D'Agostino-Pearson omnibus tests.  
480 After passing the normality tests ( $p > 0.5$ ), the data were tested for differences between  
481 samples by one-way ANOVA followed by Bonferroni multiple comparison post-test where  $p <$   
482  $0.05$  was considered significant. A Welch's unpaired t-test (unequal variances) was performed  
483 to determine to significance where two conditions were compared. All statistical tests were  
484 performed using Graphpad Prism 7 (Graphpad Software).

## 485 **Source code**

486 Unbiased cluster analysis code was written for 64-bit MATLAB R2013b (MathWorks) or  
487 higher under a Windows operating system. The latest version of the source code is available via  
488 the authors' Git repository (<https://github.com/bairangie/sobermanclusters>).

## 489 **References**

- 490 1. Galli SJ, Tsai M. IgE and mast cells in allergic disease. *Nat Med.* 2012;18(5):693-704.  
491 doi: 10.1038/nm.2755. PubMed PMID: 22561833; PubMed Central PMCID: PMC3597223.
- 492 2. Turner H, Kinet JP. Signalling through the high-affinity IgE receptor Fc epsilonRI. *Nature.*  
493 1999;402(6760 Suppl):B24-30. PubMed PMID: 10586892.
- 494 3. Stone KD, Prussin C, Metcalfe DD. IgE, mast cells, basophils, and eosinophils. *J Allergy*  
495 *Clin Immunol.* 2010;125(2 Suppl 2):S73-80. doi: 10.1016/j.jaci.2009.11.017. PubMed PMID:  
496 20176269; PubMed Central PMCID: PMC2847274.
- 497 4. Scharenberg AM, Lin S, Cuenod B, Yamamura H, Kinet JP. Reconstitution of  
498 interactions between tyrosine kinases and the high affinity IgE receptor which are controlled by  
499 receptor clustering. *EMBO J.* 1995;14(14):3385-94. PubMed PMID: 7628439; PubMed Central  
500 PMCID: PMC394405.

- 501 5. Kinet JP. The high-affinity IgE receptor (FcεRI): from physiology to pathology. *Annu Rev*  
502 *Immunol.* 1999;17:931-72. doi: 10.1146/annurev.immunol.17.1.931. PubMed PMID: 10358778.
- 503 6. Jouvin MH, Adamczewski M, Numerof R, Letourneur O, Valle A, Kinet JP. Differential  
504 control of the tyrosine kinases Lyn and Syk by the two signaling chains of the high affinity  
505 immunoglobulin E receptor. *J Biol Chem.* 1994;269(8):5918-25. PubMed PMID: 8119935.
- 506 7. Phong BL, Avery L, Sumpter TL, Gorman JV, Watkins SC, Colgan JD, et al. Tim-3  
507 enhances FcεRI-proximal signaling to modulate mast cell activation. *J Exp Med.*  
508 2015;212(13):2289-304. doi: 10.1084/jem.20150388. PubMed PMID: 26598760; PubMed  
509 Central PMCID: PMC4689164.
- 510 8. Lundeen KA, Sun B, Karlsson L, Fourie AM. Leukotriene B4 receptors BLT1 and BLT2:  
511 expression and function in human and murine mast cells. *J Immunol.* 2006;177(5):3439-47.  
512 PubMed PMID: 16920986.
- 513 9. Weller CL, Collington SJ, Brown JK, Miller HR, Al-Kashi A, Clark P, et al. Leukotriene  
514 B4, an activation product of mast cells, is a chemoattractant for their progenitors. *J Exp Med.*  
515 2005;201(12):1961-71. doi: 10.1084/jem.20042407. PubMed PMID: 15955837; PubMed Central  
516 PMCID: PMC2212026.
- 517 10. Orange RP, Valentine MD, Austen KF. Antigen-induced release of slow reacting  
518 substance of anaphylaxis (SRS-A rat) in rats prepared with homologous antibody. *J Exp Med.*  
519 1968;127(4):767-82. PubMed PMID: 4384530; PubMed Central PMCID: PMC2138477.
- 520 11. Murphy RC, Hammarstrom S, Samuelsson B. Leukotriene C: a slow-reacting substance  
521 from murine mastocytoma cells. *Proc Natl Acad Sci U S A.* 1979;76(9):4275-9. PubMed PMID:  
522 41240; PubMed Central PMCID: PMC411556.
- 523 12. Mencia-Huerta JM, Razin E, Ringel EW, Corey EJ, Hoover D, Austen KF, et al.  
524 Immunologic and ionophore-induced generation of leukotriene B4 from mouse bone marrow-  
525 derived mast cells. *J Immunol.* 1983;130(4):1885-90. PubMed PMID: 6300233.

- 526 13. Perkins JR, Diboun I, Dessailly BH, Lees JG, Orengo C. Transient protein-protein  
527 interactions: structural, functional, and network properties. *Structure*. 2010;18(10):1233-43. doi:  
528 10.1016/j.str.2010.08.007. PubMed PMID: 20947012.
- 529 14. Subbotin RI, Chait BT. A pipeline for determining protein-protein interactions and  
530 proximities in the cellular milieu. *Mol Cell Proteomics*. 2014;13(11):2824-35. doi:  
531 10.1074/mcp.M114.041095. PubMed PMID: 25172955; PubMed Central PMCID: PMC4223475.
- 532 15. Monachino E, Spenkeliink LM, van Oijen AM. Watching cellular machinery in action, one  
533 molecule at a time. *J Cell Biol*. 2017;216(1):41-51. doi: 10.1083/jcb.201610025. PubMed PMID:  
534 27979907; PubMed Central PMCID: PMC5223611.
- 535 16. Glover S, de Carvalho MS, Bayburt T, Jonas M, Chi E, Leslie CC, et al. Translocation of  
536 the 85-kDa phospholipase A2 from cytosol to the nuclear envelope in rat basophilic leukemia  
537 cells stimulated with calcium ionophore or IgE/antigen. *J Biol Chem*. 1995;270(25):15359-67.  
538 PubMed PMID: 7797525.
- 539 17. Gijon MA, Spencer DM, Kaiser AL, Leslie CC. Role of phosphorylation sites and the C2  
540 domain in regulation of cytosolic phospholipase A2. *J Cell Biol*. 1999;145(6):1219-32. PubMed  
541 PMID: 10366595; PubMed Central PMCID: PMC2133140.
- 542 18. Brock TG, Paine R, 3rd, Peters-Golden M. Localization of 5-lipoxygenase to the nucleus  
543 of unstimulated rat basophilic leukemia cells. *J Biol Chem*. 1994;269(35):22059-66. PubMed  
544 PMID: 8071328.
- 545 19. Brock TG, McNish RW, Peters-Golden M. Translocation and leukotriene synthetic  
546 capacity of nuclear 5-lipoxygenase in rat basophilic leukemia cells and alveolar macrophages. *J*  
547 *Biol Chem*. 1995;270(37):21652-8. PubMed PMID: 7665580.
- 548 20. Chen XS, Naumann TA, Kurre U, Jenkins NA, Copeland NG, Funk CD. cDNA cloning,  
549 expression, mutagenesis, intracellular localization, and gene chromosomal assignment of  
550 mouse 5-lipoxygenase. *J Biol Chem*. 1995;270(30):17993-9. PubMed PMID: 7629107.

- 551 21. Woods JW, Coffey MJ, Brock TG, Singer, II, Peters-Golden M. 5-Lipoxygenase is  
552 located in the euchromatin of the nucleus in resting human alveolar macrophages and  
553 translocates to the nuclear envelope upon cell activation. *J Clin Invest.* 1995;95(5):2035-46. doi:  
554 10.1172/JCI117889. PubMed PMID: 7738170; PubMed Central PMCID: PMC295787.
- 555 22. Mandal AK, Jones PB, Bair AM, Christmas P, Miller D, Yamin TT, et al. The nuclear  
556 membrane organization of leukotriene synthesis. *Proc Natl Acad Sci U S A.*  
557 2008;105(51):20434-9. Epub 2008/12/17. doi: 10.1073/pnas.0808211106. PubMed PMID:  
558 19075240; PubMed Central PMCID: PMC2629249.
- 559 23. Bair AM, Turman MV, Vaine CA, Panettieri RA, Jr., Soberman RJ. The nuclear  
560 membrane leukotriene synthetic complex is a signal integrator and transducer. *Mol Biol Cell.*  
561 2012;23(22):4456-64. doi: 10.1091/mbc.E12-06-0489. PubMed PMID: 23015755; PubMed  
562 Central PMCID: PMC3496618.
- 563 24. Ferguson AD, McKeever BM, Xu S, Wisniewski D, Miller DK, Yamin TT, et al. Crystal  
564 structure of inhibitor-bound human 5-lipoxygenase-activating protein. *Science.*  
565 2007;317(5837):510-2. doi: 10.1126/science.1144346. PubMed PMID: 17600184.
- 566 25. Christmas P, Weber BM, McKee M, Brown D, Soberman RJ. Membrane localization and  
567 topology of leukotriene C4 synthase. *J Biol Chem.* 2002;277(32):28902-8. Epub 2002/05/23.  
568 doi: 10.1074/jbc.M203074200. PubMed PMID: 12023288.
- 569 26. Rius M, Hummel-Eisenbeiss J, Keppler D. ATP-dependent transport of leukotrienes B4  
570 and C4 by the multidrug resistance protein ABCC4 (MRP4). *J Pharmacol Exp Ther.*  
571 2008;324(1):86-94. Epub 2007/10/26. doi: 10.1124/jpet.107.131342. PubMed PMID: 17959747.
- 572 27. Wu H. Higher-order assemblies in a new paradigm of signal transduction. *Cell.*  
573 2013;153(2):287-92. Epub 2013/04/16. doi: 10.1016/j.cell.2013.03.013. PubMed PMID:  
574 23582320; PubMed Central PMCID: PMC3687143.



- 575 28. Wu H, Fuxreiter M. The structure and dynamics of higher-order assemblies: amyloids,  
576 signalosomes, and granules. *Cell*. 2016;165(5):1055-66. Epub 2016/05/21. doi:  
577 10.1016/j.cell.2016.05.004. PubMed PMID: 27203110; PubMed Central PMCID: PMC4878688.
- 578 29. Lin SC, Lo YC, Wu H. Helical assembly in the MyD88-IRAK4-IRAK2 complex in TLR/IL-  
579 1R signalling. *Nature*. 2010;465(7300):885-90. Epub 2010/05/21. doi: 10.1038/nature09121.  
580 PubMed PMID: 20485341; PubMed Central PMCID: PMC2888693.
- 581 30. Wang L, Yang JK, Kabaleeswaran V, Rice AJ, Cruz AC, Park AY, et al. The Fas-FADD  
582 death domain complex structure reveals the basis of DISC assembly and disease mutations.  
583 *Nat Struct Mol Biol*. 2010;17(11):1324-9. doi: 10.1038/nsmb.1920. PubMed PMID: 20935634;  
584 PubMed Central PMCID: PMC2988912.
- 585 31. Pagoon SV, Nicovich PR, Mollazade M, Tabarin T, Gaus K. Clus-DoC: a combined  
586 cluster detection and colocalization analysis for single-molecule localization microscopy data.  
587 *Mol Biol Cell*. 2016;27(22):3627-36. doi: 10.1091/mbc.E16-07-0478. PubMed PMID: 27582387;  
588 PubMed Central PMCID: PMC5221594.
- 589 32. Veatch SL, Machta BB, Shelby SA, Chiang EN, Holowka DA, Baird BA. Correlation  
590 functions quantify super-resolution images and estimate apparent clustering due to over-  
591 counting. *PLoS One*. 2012;7(2):e31457. doi: 10.1371/journal.pone.0031457. PubMed PMID:  
592 22384026; PubMed Central PMCID: PMC3288038.
- 593 33. Spiess M, Hernandez-Varas P, Oddone A, Olofsson H, Blom H, Waithe D, et al. Active  
594 and inactive beta1 integrins segregate into distinct nanoclusters in focal adhesions. *J Cell Biol*.  
595 2018;217(6):1929-40. Epub 2018/04/11. doi: 10.1083/jcb.201707075. PubMed PMID:  
596 29632027; PubMed Central PMCID: PMC5987715.
- 597 34. Moore TI, Aaron J, Chew TL, Springer TA. Measuring integrin conformational change on  
598 the cell surface with super-resolution microscopy. *Cell Rep*. 2018;22(7):1903-12. Epub  
599 2018/02/15. doi: 10.1016/j.celrep.2018.01.062. PubMed PMID: 29444440; PubMed Central  
600 PMCID: PMC5851489.

- 601 35. Mandal AK, Skoch J, Bacskai BJ, Hyman BT, Christmas P, Miller D, et al. The  
602 membrane organization of leukotriene synthesis. *Proc Natl Acad Sci U S A*. 2004;101(17):6587-  
603 92. Epub 2004/04/16. doi: 10.1073/pnas.0308523101. PubMed PMID: 15084748; PubMed  
604 Central PMCID: PMC404089.
- 605 36. Gerstmeier J, Weinigel C, Rummler S, Radmark O, Werz O, Garscha U. Time-resolved  
606 in situ assembly of the leukotriene-synthetic 5-lipoxygenase/5-lipoxygenase-activating protein  
607 complex in blood leukocytes. *FASEB J*. 2016;30(1):276-85. Epub 2015/09/24. doi:  
608 10.1096/fj.15-278010. PubMed PMID: 26396238.
- 609 37. Hafner AK, Gerstmeier J, Hornig M, George S, Ball AK, Schroder M, et al.  
610 Characterization of the interaction of human 5-lipoxygenase with its activating protein FLAP.  
611 *Biochim Biophys Acta*. 2015;1851(11):1465-72. Epub 2015/09/04. doi:  
612 10.1016/j.bbaliip.2015.08.010. PubMed PMID: 26327594.
- 613 38. Gerstmeier J, Newcomer ME, Dennhardt S, Romp E, Fischer J, Werz O, et al. 5-  
614 Lipoxygenase-activating protein rescues activity of 5-lipoxygenase mutations that delay nuclear  
615 membrane association and disrupt product formation. *FASEB J*. 2016;30(5):1892-900. Epub  
616 2016/02/05. doi: 10.1096/fj.201500210R. PubMed PMID: 26842853; PubMed Central PMCID:  
617 PMC4836370.
- 618 39. Dempsey GT. A user's guide to localization-based super-resolution fluorescence  
619 imaging. *Methods Cell Biol*. 2013;114:561-92. doi: 10.1016/B978-0-12-407761-4.00024-5.  
620 PubMed PMID: 23931523.
- 621 40. Comaniciu DR, V.; Meer, P. The variable bandwidth mean shift and data-driven scale  
622 selection. *IEEE Conf Pub*. 2001;1:438-45. doi: 10.1109/ICCV.2001.937550.
- 623 41. Ester MK, HP.; Sander, J.; Xu, X. A density-based algorithm for discovering clusters in  
624 large spatial databases with noise. *Proc Second Int Conf Knowledge Discovery Data Mining*  
625 (KDD-96). 1996.
- 626

## 627 **Supporting Information**

628 **S1 Fig. Strategy for analysis of the higher order assemblies of 5-LO and FLAP via**  
629 **unbiased cluster analysis.** RBL-2H3 mast cells were primed with anti-TNP antibody followed  
630 by crosslinking of FcεR1 by addition of TNP-BSA. Media was removed from each well and  
631 analyzed for LTC<sub>4</sub>. Cells were fixed, permeabilized, and prepared for molecular imaging.  
632 STORM localization lists were converted to tab-delimited text files. Image panels illustrate the  
633 process. (A) STORM image of FLAP localizations in an activated mast cell. (B) A region of  
634 interest (ROI) is drawn around the nuclear envelope FLAP localizations. (C) Localizations inside  
635 the ROI (orange) are clustered by unbiased cluster analysis. (D) The convex hull of points in a  
636 cluster (inset area from C) defines the cluster area, from which properties are calculated  
637 including number of localizations, area and density. For 5-LO, the entire nucleus and  
638 perinuclear region were included in the ROIs because 5-LO is cytoplasmic in unstimulated cells  
639 and thus the nuclear envelope is not apparent. Scale bar = 4 μm.

640 **S2 Fig. Frequency distributions of DoC scores for 5-LO and FLAP.** Localization data was  
641 collected by two-color dSTORM and analyzed with ClusDoC. The cells shown in Fig 2 were  
642 used to calculate DoC scores. (A) Histograms of DoC scores of all molecules for 5-LO (green)  
643 and FLAP (red) at 2min, (B) 7min, (C) 10 min.

644 **S3 Fig. Cluster maps for both 5-LO and FLAP.** RBL-2H3 cells were primed with anti-TNP IgE  
645 then activated with TNP-BSA for 0, 2, 5 and 10 min. Localization data was collected by two-  
646 color dSTORM and analyzed with ClusDoC. Cluster maps for 5-LO (A, green) and FLAP (B,  
647 red) from representative cells from Fig 2 over time were generated. Nonclustered localizations  
648 are colored gray.

649 **S4 Fig. Frequency distribution analysis of 5-LO clusters.** RBL-2H3 cells were primed with  
650 anti-TNP IgE then activated with TNP-BSA for 0, 2, 5 and 10 min and analyzed as shown S1  
651 Fig. Cells were imaged with conventional STORM and cluster properties were analyzed with

652 unbiased cluster analysis. (A-C) Normalized point-weighted histograms with inset bars showing  
653 mean  $\pm$  SEM for (A) number of localizations, (B) cluster areas and (C) cluster densities. One-  
654 way ANOVA with Bonferroni post hoc test was performed to determine significance, indicated  
655 by \*\*\*\* $p < 0.0005$ . At least 3 separate experiments collected between 10 and 30 cells.

656 **S5 Fig. Inhibition of cPLA<sub>2</sub> and FLAP controls 5-LO and FLAP higher order assemblies.**

657 RBL-2H3 cells were incubated with or without cPLA<sub>2</sub> Inh or MK886, and then primed with anti-  
658 TNP IgE. They were then stimulated by the addition of TNP-BSA for 7 min. The cells were  
659 imaged with conventional STORM, and cluster properties were analyzed with unbiased cluster  
660 analysis. (A-F) Normalized point-weighted histograms with inset bars showing mean  $\pm$  SEM for  
661 (A,D) number of localizations, (B,E) cluster areas and (C,F) cluster densities for 5-LO and  
662 FLAP, respectively. The area shaded blue represents localizations in cells primed and activated  
663 for 7 min. The solid red line represents cells incubated with cPLA<sub>2</sub> Inh and primed and activated.  
664 The dotted yellow line represents cells incubated with MK886 and primed and activated. One-  
665 way ANOVA with Bonferroni post hoc test was performed to determine significance, indicated  
666 by \* $p < 0.05$  and \*\*\* $p = 0.0005$ . At least 3 separate experiments collected between 10 and 30  
667 cells.

668 **S1 Data. Properties of clusters identified by Clus-DoC for each ROI from two-color**  
669 **dSTORM.**

670 **S2 Data. Localizations for each ROI from two-color dSTORM accepted by Clus-DoC for**  
671 **analysis for NT, 2 and 5 min.**

672 **S3 Data. Localizations for each ROI from two-color dSTORM accepted by Clus-DoC for**  
673 **analysis for 7 and 10 min.**

674 **S1 Table. Summary of clustering data for conventional STORM.**

INPUT:  
x/y coordinates of all molecules organized by  
channel (.txt files)

Select ROI based on FLAP

Select ROI based on FLAP, Select whole cell for 5-LO

2-color dSTORM

ClusDoC

Cluster maps and DoC score

Analyze cluster properties

Unbiased Cluster Analysis

Cluster maps

Analyze cluster properties

Single color STORM

Model of membrane interaction of 5-LO and FLAP

A

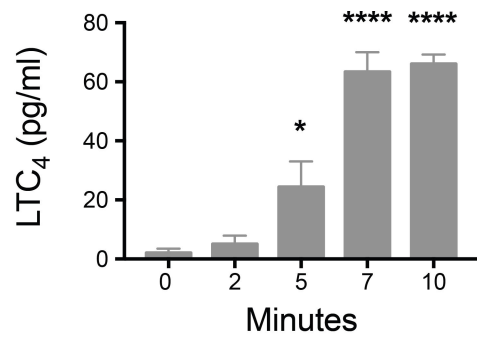

B

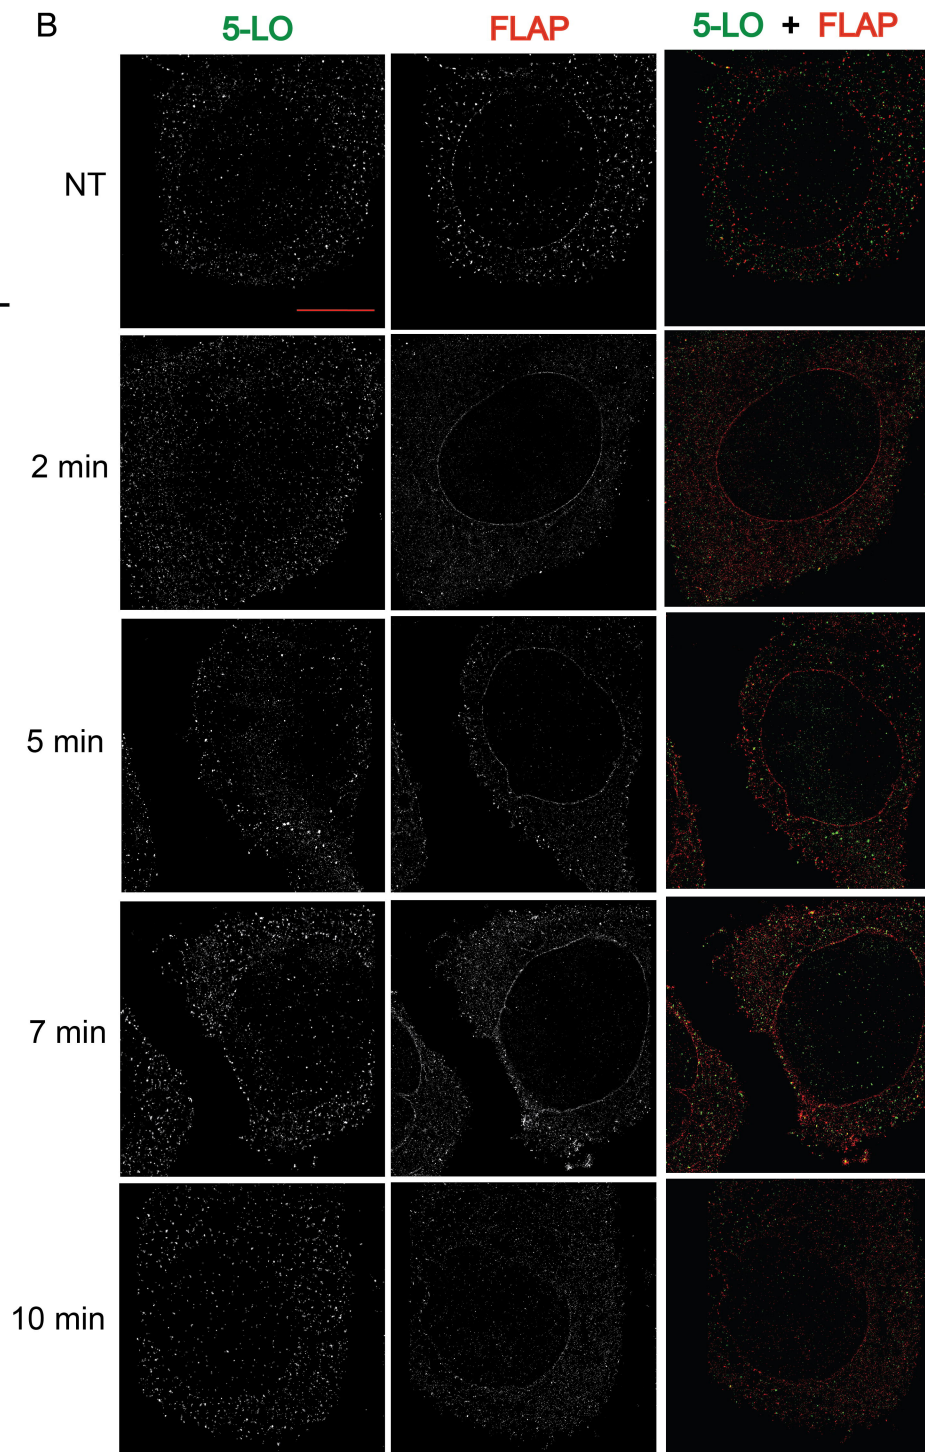

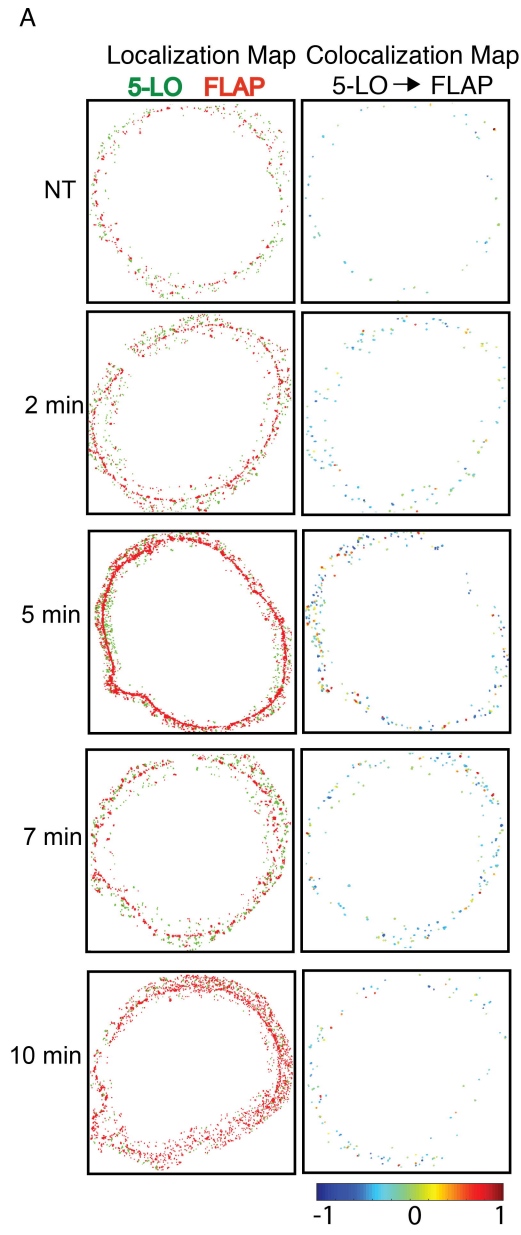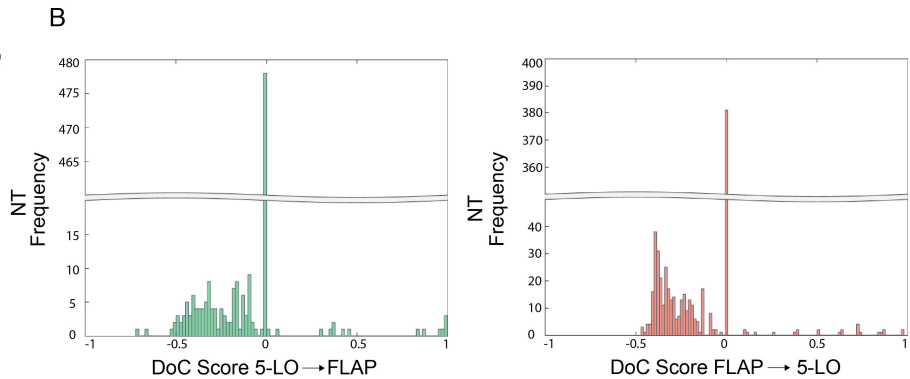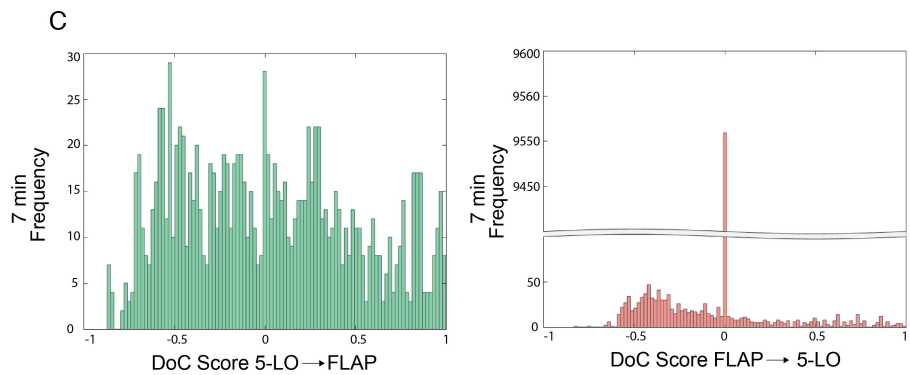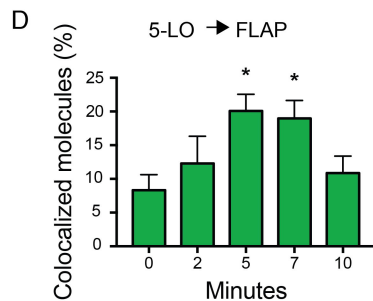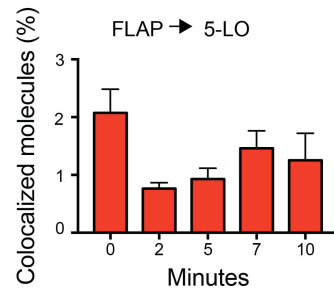

A

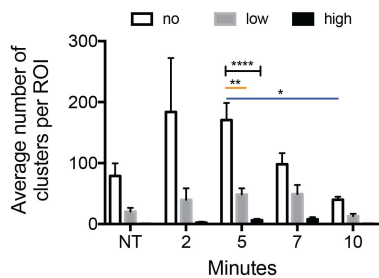

B

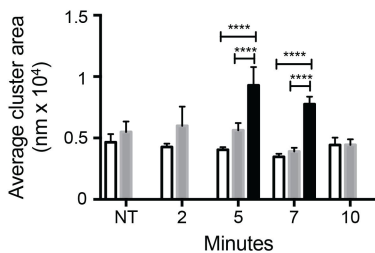

C

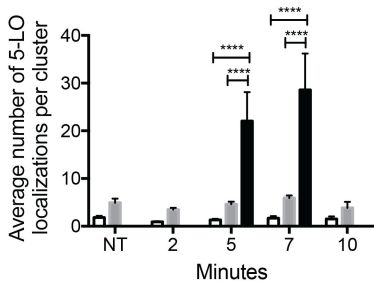

D

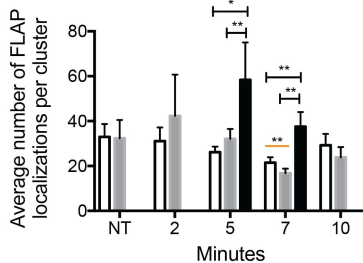

E

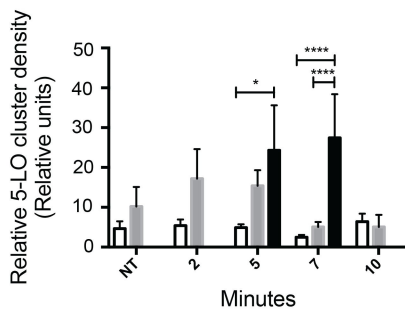

F

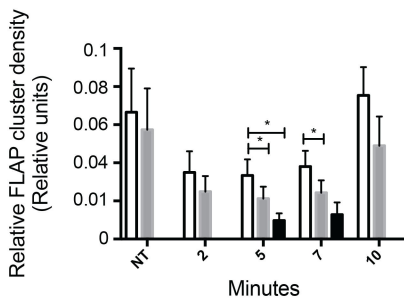

G

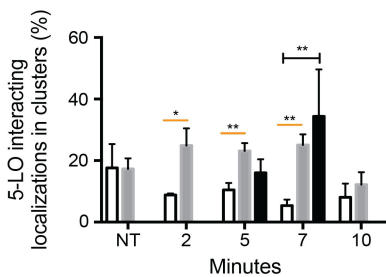

H

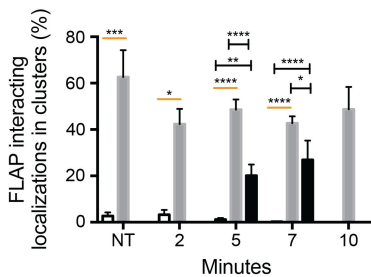



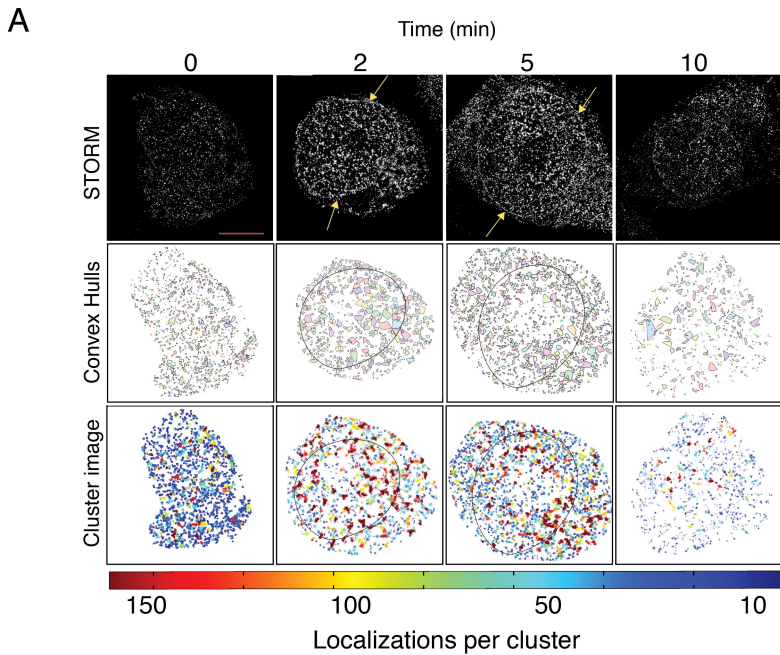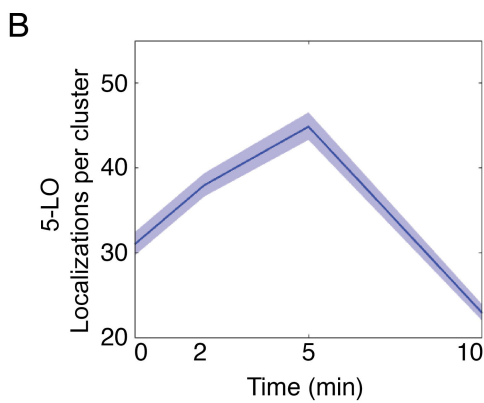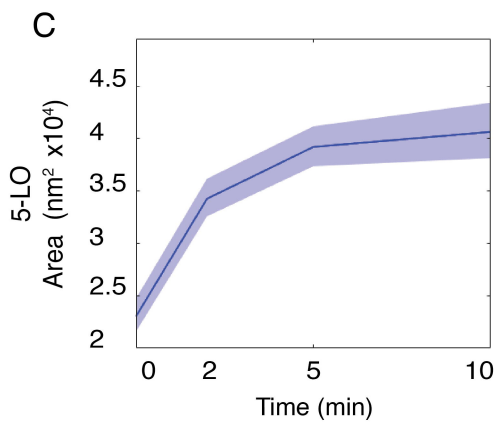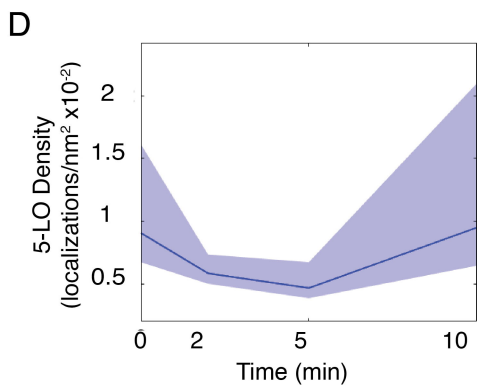

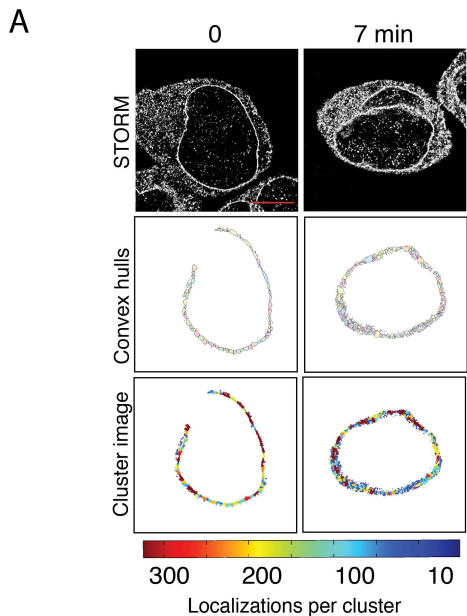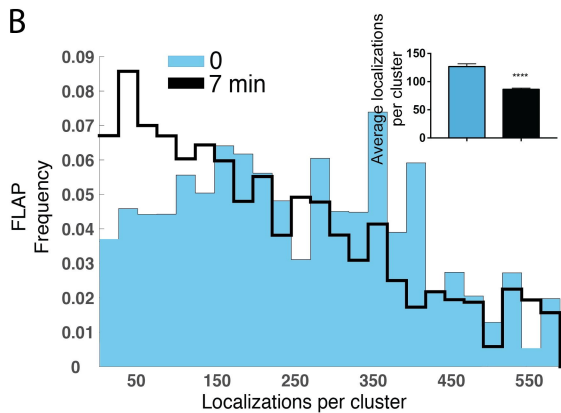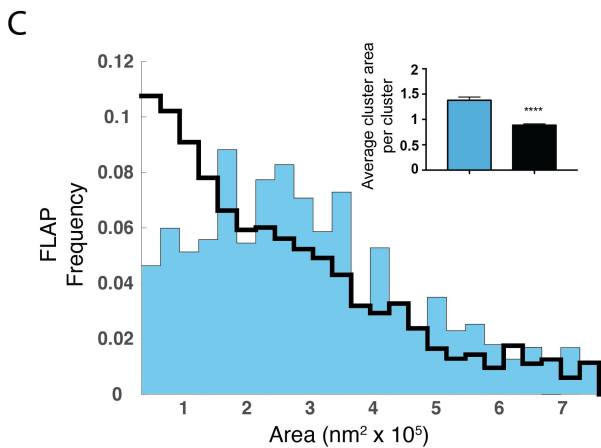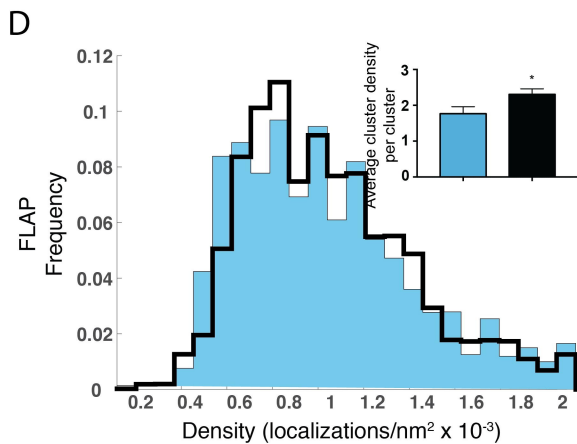

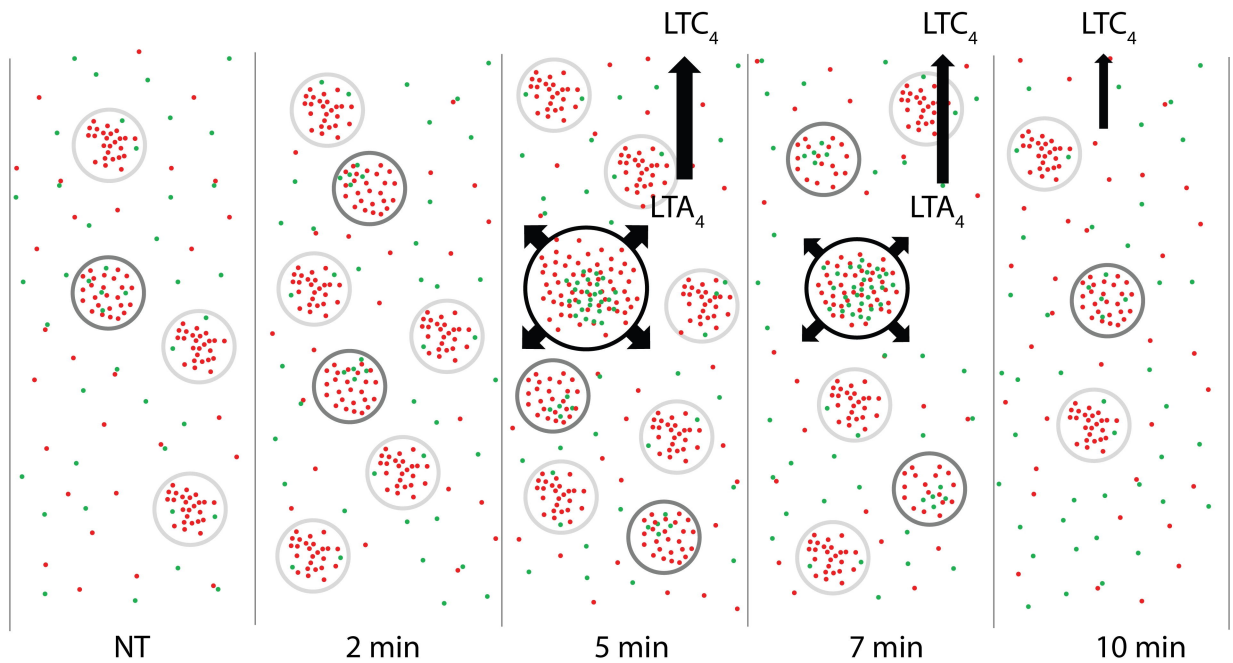

Source: https://www.biorxiv.org/content/10.1101/521625v1.full.pdf
